# Supplementary material for: Square versus tetrahedral iron clusters with polyoxometalate ligands
Source: Royal Society of Chemistry journal article supplement (doi:10.1039/b714377j), 2007-11-12
Supplement: b714377j.pdf [file b714377j.pdf]

## Supporting Information

### Square versus tetrahedral iron clusters with polyoxometalates ligands†

Céline Pichon,<sup>a</sup> Anne Dolbecq,<sup>\*a</sup> Pierre Mialane,<sup>a</sup> Jérôme Marrot,<sup>a</sup> Eric Rivière,<sup>b</sup> and Francis Sécheresse<sup>a</sup>

#### TGA for 1:

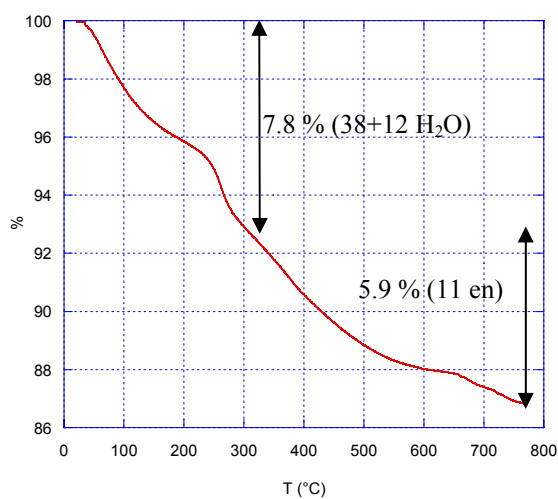

#### TGA for 2:

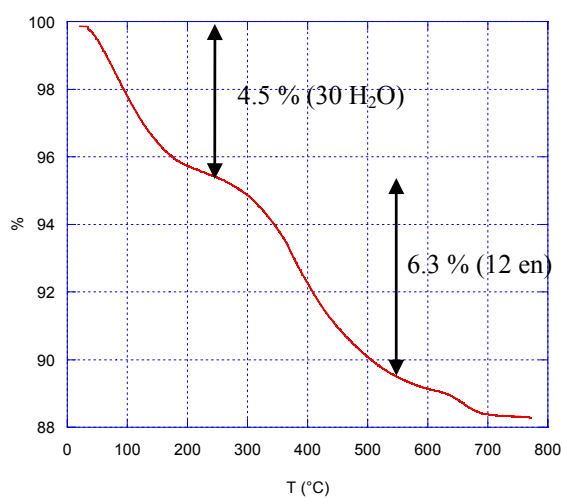

Figure S11. TG curve of 1 and 2 under nitrogen flow.

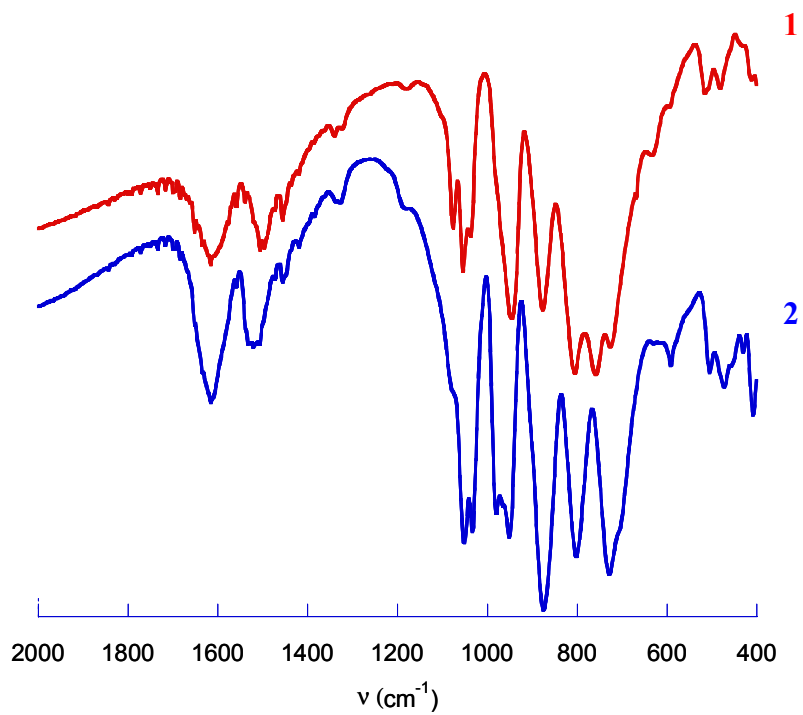

**Figure SI2.** IR spectra of **1** and **2**.

a)

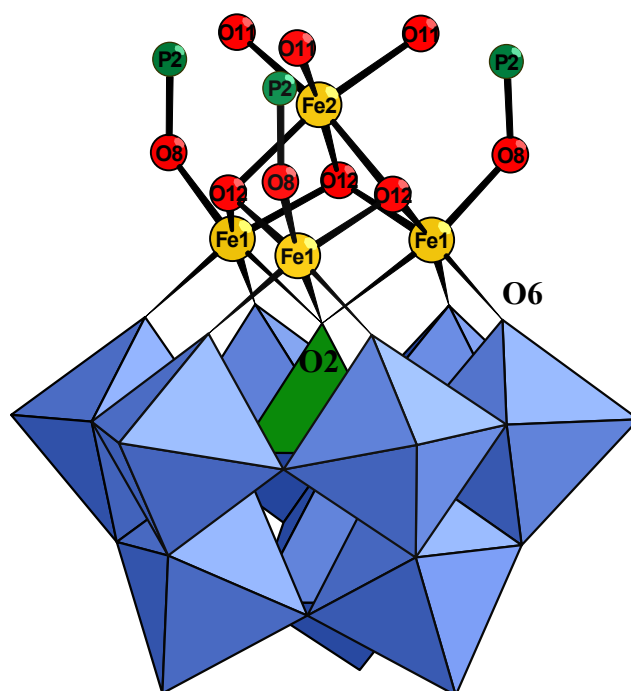

b)

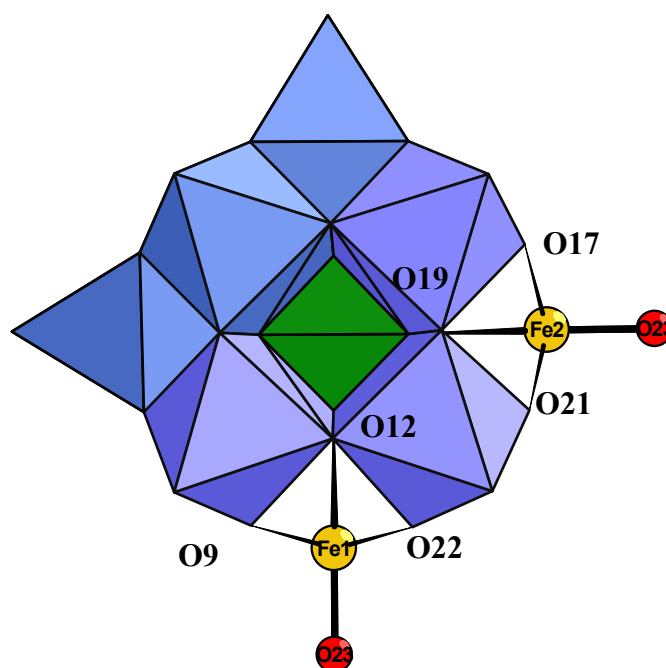

**Figure SI3.** Mixed ball and stick and polyhedral representation with partial atomic labelling scheme of a) the cubane-type unit capping the  $[\text{PW}_9\text{O}_{34}]^{9-}$  lacunary POM in **1**. Fe1-O8 1.916(16), Fe1-O6 1.968(11), Fe1-O12 2.001(9), Fe1-O2 2.315(16), Fe2-O11 2.086(19), Fe2-O12 2.11(2) Å,  $\Sigma_8(\text{Fe1}) = 3.0$ ,  $\Sigma_8(\text{Fe2}) = 2.2$ ,  $\Sigma_8(\text{O12}) = 1.1$ ; b) the  $[\text{PW}_{10}\text{Fe}_2\text{O}_{39}]^{7-}$  anion in **2**. Fe1-O23 1.759(18), Fe1-O22 1.938(14), Fe1-O9 1.968(15), Fe1-O12 2.447(18), Fe2-O23 1.786(18), Fe2-O21 1.961(15), Fe2-O17 2.012(14), Fe2-O19 2.486(20),  $\Sigma_8(\text{Fe1}) = 3.5$ ,  $\Sigma_8(\text{Fe2}) = 3.2$ .

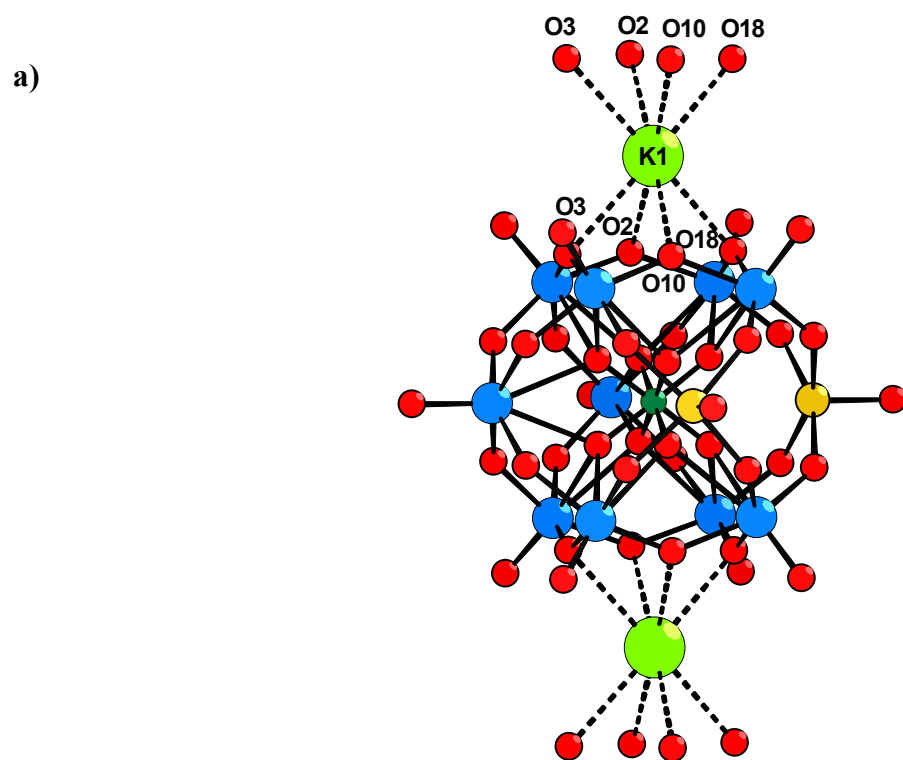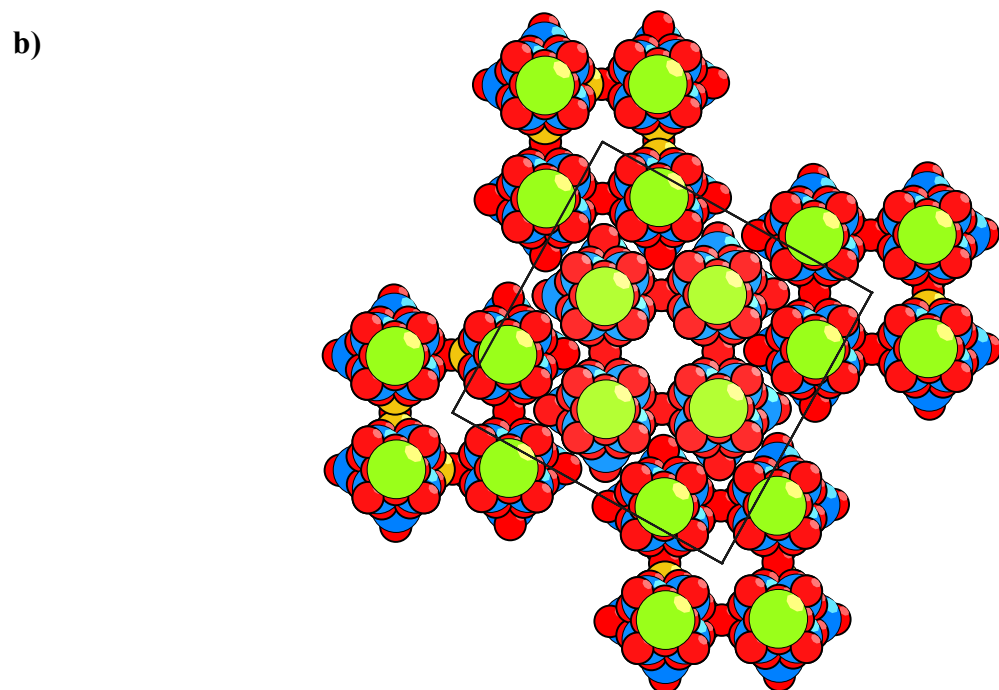

**Figure SI4.** a) View of the coordination of the potassium ions to one POM, for clarity only the four oxygen atoms of the two adjacent POMs bound to the potassium ions are represented; b) space filling representation of the arrangement of the square tetrameric POMs in the unit-cell of **2**; blue sphere W; dark green sphere, P; light green sphere, K; K1-O2 2.817(14), K1-O3 2.830(13), K1-O10 2.712(12), K1-O18 2.720(13) Å.

### Supplementary information for the magnetic part:

The magnetic data of compound **2** have been fitted considering the following equation:

$$\chi_M T = [\chi_{M_{\text{dimer}}} T \times 4] \times \rho + [\chi_{M_{\text{monomer}}} T] \times M_{\text{Fe8}} \times (1-\rho) / M_{\text{impurity}}$$

with :

$\chi_{M_{\text{dimer}}} T = (2N\beta^2 g^2/k) [(x + 5x^3 + 14x^6 + 30x^{10} + 55x^{15}) / (1 + 3x + 5x^3 + 7x^6 + 9x^{10} + 11x^{15})]$  with  $x = \exp(J/kT)$  and where  $\rho$  is the molar fraction of paramagnetic impurity,  $M_{\text{Fe8}}$  and  $M_{\text{impurity}}$  being the molecular weight of the octanuclear  $\text{Fe}^{\text{III}}$  cluster and of the monomeric  $(\text{C}_2\text{N}_2\text{H}_{10})_2[\text{PW}_{11}\text{O}_{39}\text{Fe}^{\text{III}}] \cdot 15\text{H}_2\text{O}$  complex postulated as the paramagnetic impurity, respectively.
